# Supplementary material for: Genome-scale CRISPR-Cas9 knockout screening in nasopharyngeal carcinoma for radiosensitive and radioresistant genes
Source: PubMed Central journal article supplement — Transl Oncol. 2023 Feb 3;30:101625. doi: 10.1016/j.tranon.2023.101625 (PMC9932185; doi:10.1016/j.tranon.2023.101625), 2023-02-03
Supplement: mmc1.pdf [file mmc1.pdf]

## Supplementary Information

### Genome-scale CRISPR-Cas9 knockout screening in nasopharyngeal carcinoma for radiosensitive and radioresistant genes

#### *Translational Oncology*

Ziyan Zhou<sup>1,2,3\*</sup>, Gang Chen<sup>4\*</sup>; Mingjun Shen<sup>1,2,3</sup>, Jixi Li<sup>1,2,3</sup>, Kang Liu<sup>1,2,3</sup>, Ming Liu<sup>5</sup>; Shuo Shi<sup>6</sup>, Dong Yang<sup>1,2,3</sup>, Wei Chen<sup>1,2,3</sup>, Sixia Chen<sup>1,2,3</sup>, Yuanxiu Yin<sup>1,2,3</sup>, Yating Qin<sup>1,2,3</sup>, Xuejing Su<sup>1,2,3</sup>, Weimin Chen<sup>1,2,3</sup>, Min Kang<sup>1,2,3</sup>

<sup>1</sup>Department of Radiation Oncology, the First Affiliated Hospital of Guangxi Medical University, Nanning, 530021, Guangxi, China;

<sup>2</sup>Key Laboratory of Early Prevention and Treatment for Regional High Frequency Tumor (Guangxi Medical University), Ministry of Education, Nanning, 530021, Guangxi, China;

<sup>3</sup>Guangxi Key Laboratory of Immunology and Metabolism for Liver Diseases, Nanning, 530021, Guangxi, China;

<sup>4</sup>Department of Pathology, The First Affiliated Hospital of Guangxi Medical University, Nanning, Guangxi, P. R. China;

<sup>5</sup>Guangzhou Genesee Biotech Co., Ltd., Guangzhou, P. R. China;

<sup>6</sup>Department of Thoracic Surgery, The First Affiliated Hospital of Guangxi Medical University, Nanning, Guangxi, P.R. China.

\*These authors have contributed equally to this work

#### **Corresponding author:**

Kang Min, Department of Radiation Oncology, The First Affiliated Hospital of Guangxi Medical University, No. 6, Shuangyong Road, Nanning 530021, Guangxi, P. R. China. Tel: 86-0771-5356509, 86-15977724416; E-mail address: kangmin@gxmu.edu.cn; ORCID: 0000-0003-2287-8757

**Fig. S1** The quality inspection test about CRISPR-PoolTMKOUT-Human-Single vector Vector library sgRNA.

**Fig.S2** Determination of the virus library MOI value. (A) CCK8 assay for cell viability under different cell MOI; (B) Light microscope images of C666-1 cells treated with Puro for different times.

**Fig. S3** Optical microscopic images of C666-1 cells transfected with lentiviral sgRNA library and treated with irradiation (1Gy, 2Gy, 4Gy) after 2, 4, and 5 days.

**Fig. S4** Fluorescence microscopy images of C666-1 cells infected with the CRISPR control or CRISPR/Cas9 (+) virus.

**Fig. S5** Fluorescence microscopy images of CNE1 cells infected with the CRISPR control or CRISPR/Cas9 (+) virus.

**Fig. S6** Western blot was used to verify CRISPR/Cas9-mediated knockdown effect of 11 key functional genes in CNE1 cells. (A) Western blot of individual gene knockouts in CNE1 cells infected with the CRISPR control or CRISPR /cas9 (+) virus,  $\beta$ -actin was used as loading control. (B) Quantification of individual gene knockout band intensity in western blot.

**Fig. S7** RT-qPCR of individual gene knockouts in CNE1 cells infected with the CRISPR control or CRISPR/Cas9 (+) virus.

**Fig. S8** CCK8 assay for CNE1 cells with single gene knockout.

**Fig. S9** Clony formation was used to verify the successful construction of radiation-resistant 5-8F cells(5-8FR). Reported values were mean  $\pm$  SD from three independent experiments. \*\*P < 0.01, \*\*\*P <0.001; \*\*\*\*P < 0.0001.

**Fig. S10** RT-qPCR was used to determine the expression levels of 11 genes in 5-8F cells and 5-8FR to confirm their radioresistant or radiosensitive status.

**Table S1.** sgRNA sequences of candidate genes for knockdown

**Table S2.** Primers of candidate genes for RT-qPCR

**Table S3.** Coverage statistics of library sgRNA

**Table S4.** Homogeneity analysis of library sgRNA

**Table S5.** Determination of lentivirus titer

**Table S6.** Library virus purity test results

**Table S7.** Key genes information in the results of high-throughput sequencing Analysis

**Table S8.** Detailed information of GO analysis for the selected nine genes

**Table S9.** KEGG pathway analysis of candidate genes

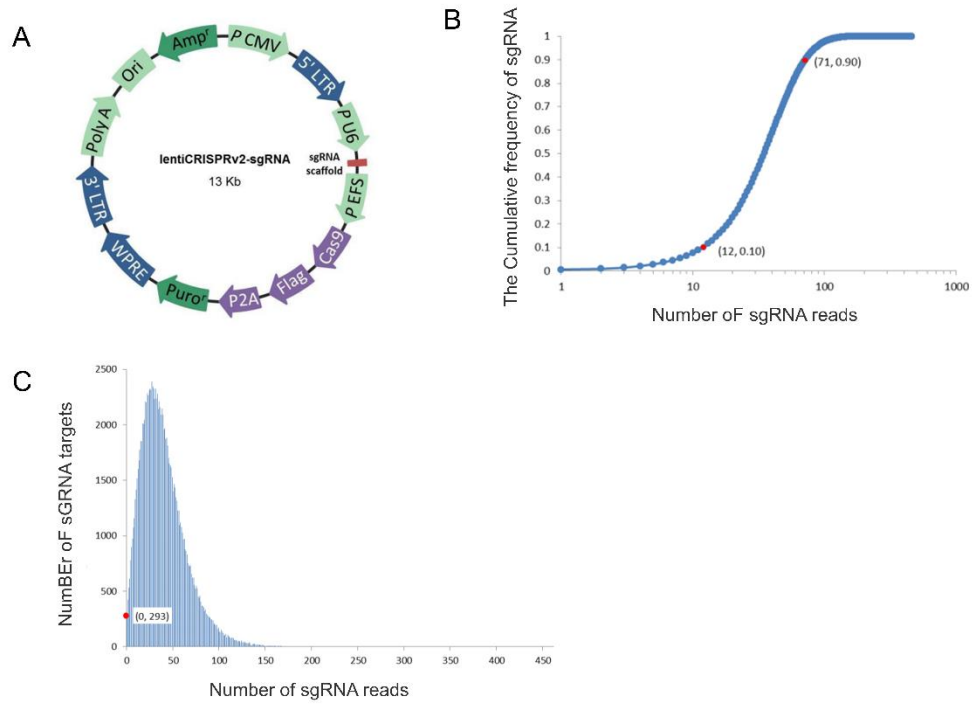

**Fig. S1** The quality inspection test about CRISPR-PoolTMKOUT-Human-Single vector Vector library sgRNA.

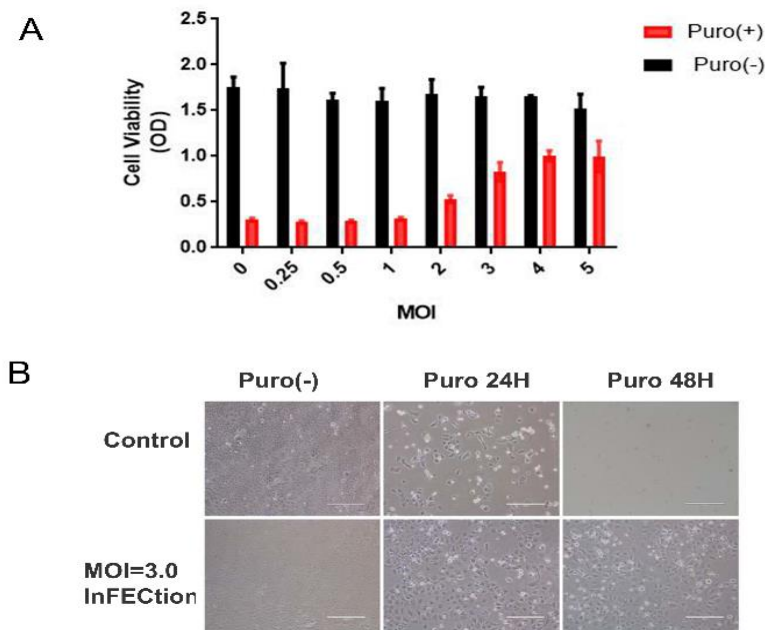

**Fig.S2** Determination of the virus library MOI value. **(a)** CCK8 assay for cell viability under different cell MOI; **(b)** Light microscope images of C666-1 cells treated with Puro for different times.

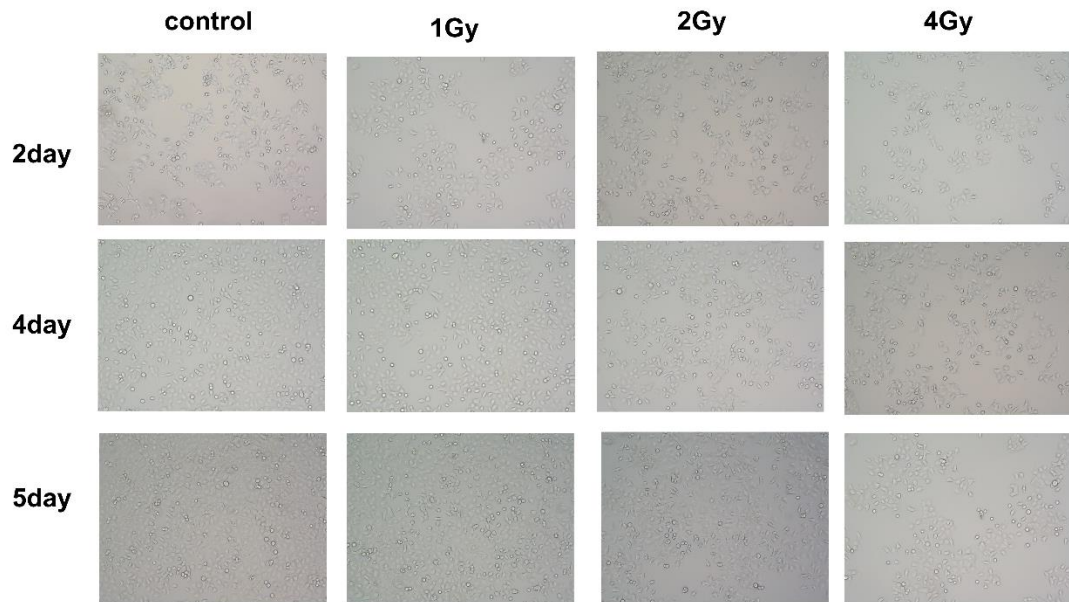

**Fig. S3** Optical microscopic images of C666-1 cells transfected with lentiviral sgRNA library and treated with irradiation (1Gy, 2Gy, 4Gy) after 2, 4, and 5 days.

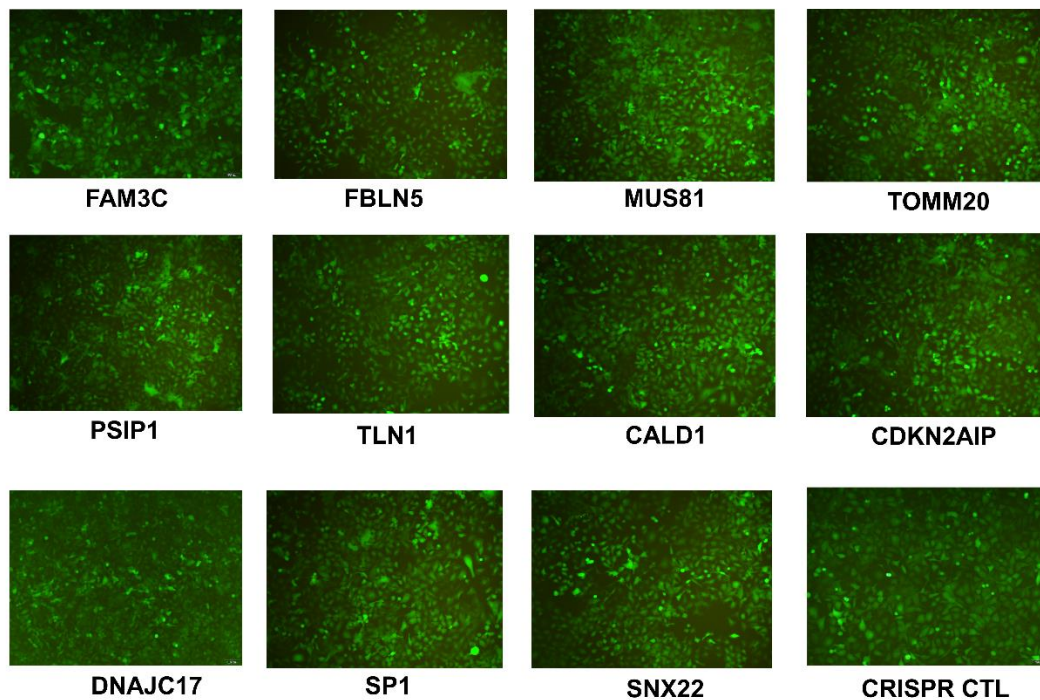

**Fig. S4** Fluorescence microscopy images of C666-1 cells infected with the CRISPR control or CRISPR/Cas9 (+) virus.

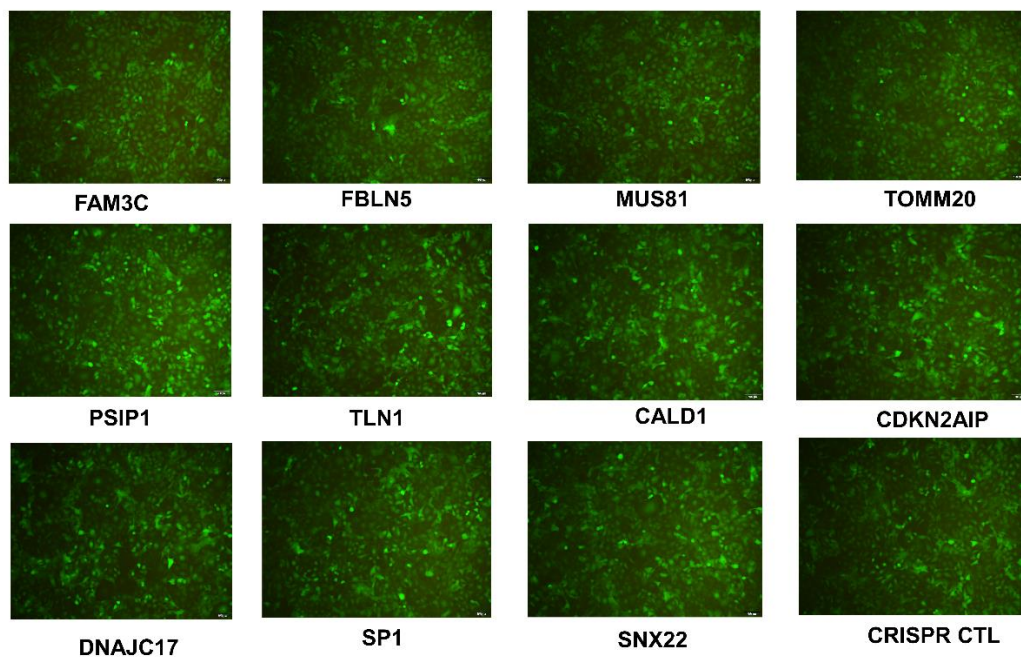

**Fig. S5** Fluorescence microscopy images of CNE1 cells infected with the CRISPR control or CRISPR/Cas9 (+) virus.

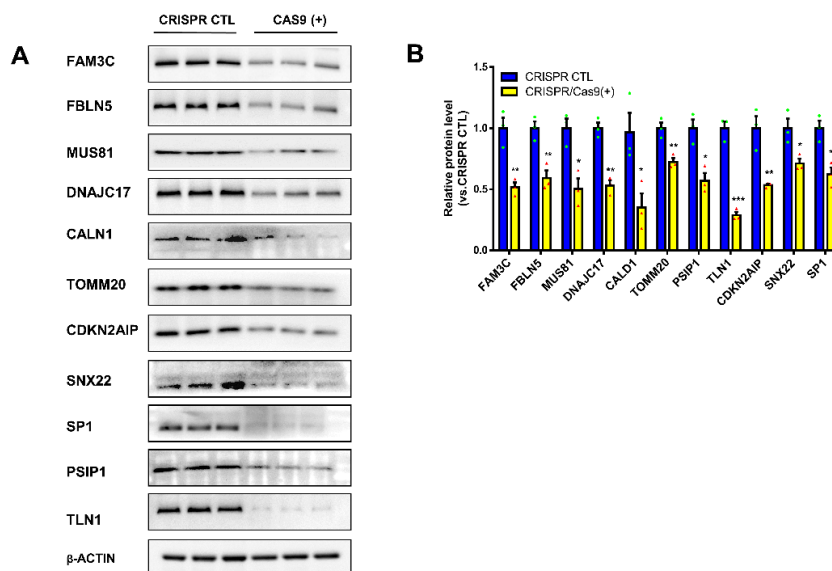

**Fig. S6** Western blot was used to verify CRISPR/Cas9-mediated knockdown effect of 11 key functional genes in CNE1 cells. **(a)** Western blot of individual gene knockouts in CNE1 cells infected with the CRISPR control or CRISPR /cas9 (+) virus,  $\beta$ -actin was used as loading control. **(b)** Quantification of individual gene knockout band intensity in western blot.

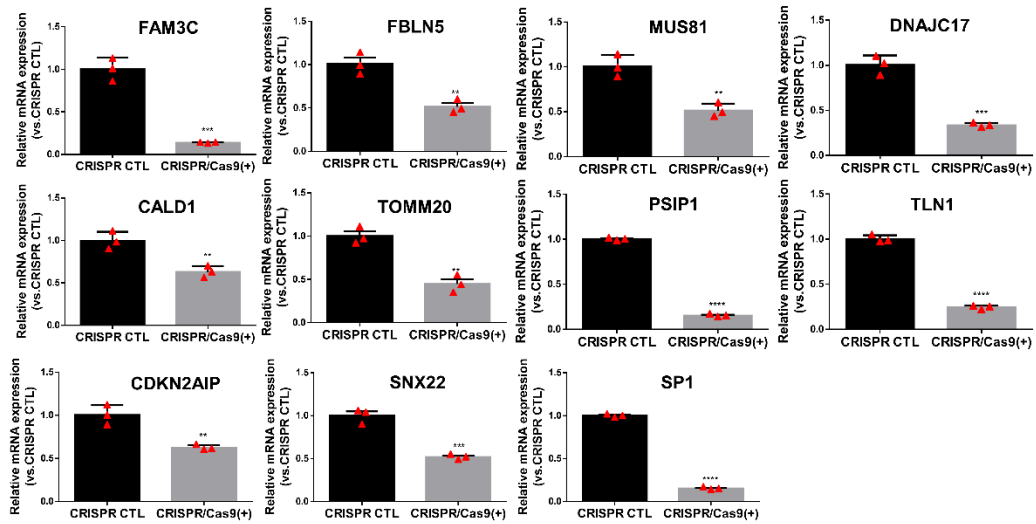

**Fig. S7** RT-qPCR of individual gene knockouts in CNE1 cells infected with the CRISPR control or CRISPR/Cas9 (+) virus.

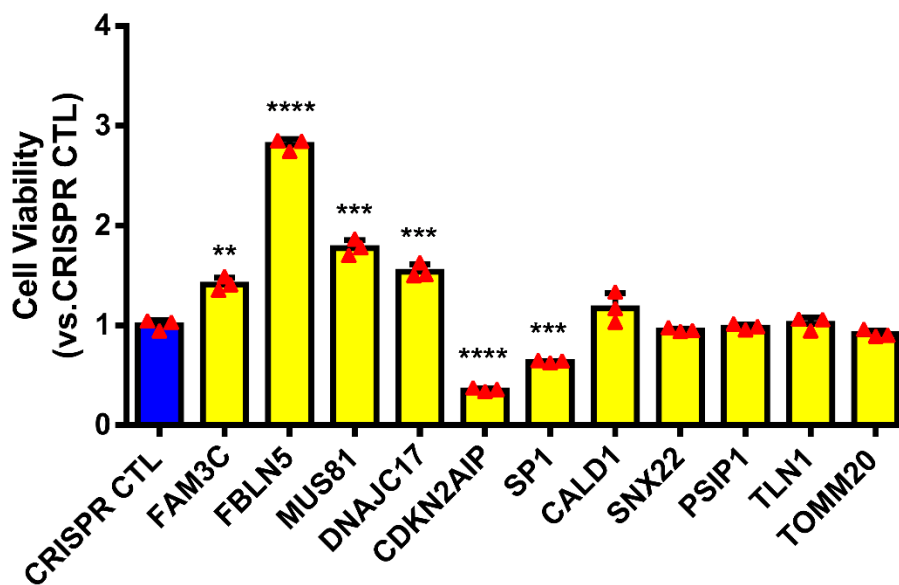

**Fig. S8** CCK8 assay for CNE1 cells with single gene knockout.

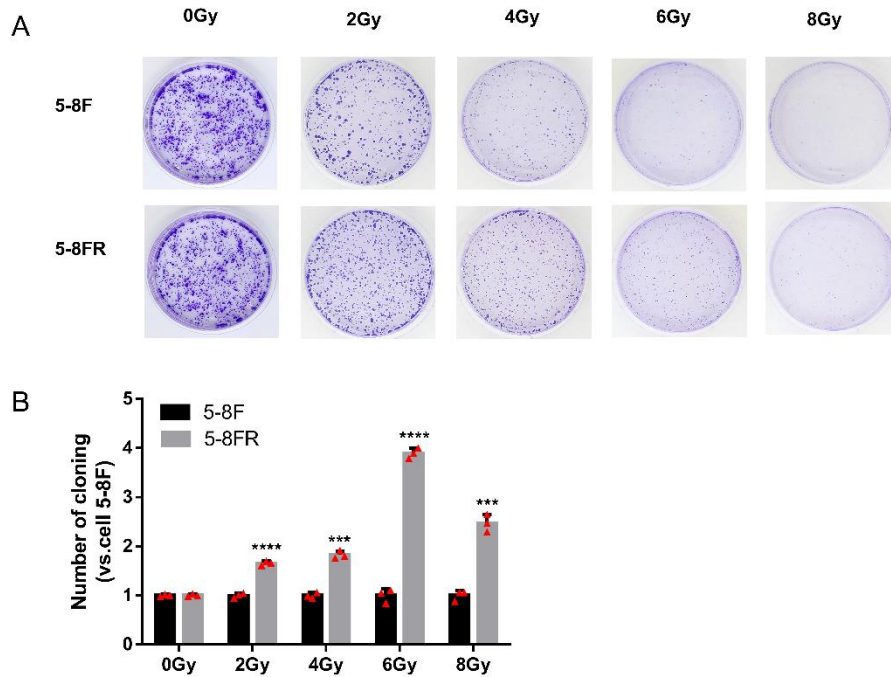

**Fig. S9** Clony formation was used to verify the successful construction of radiation-resistant 5-8F cells(5-8FR). Reported values were mean  $\pm$  SD from three independent experiments. \*\*P < 0.01, \*\*\*P < 0.001; \*\*\*\*P < 0.0001.

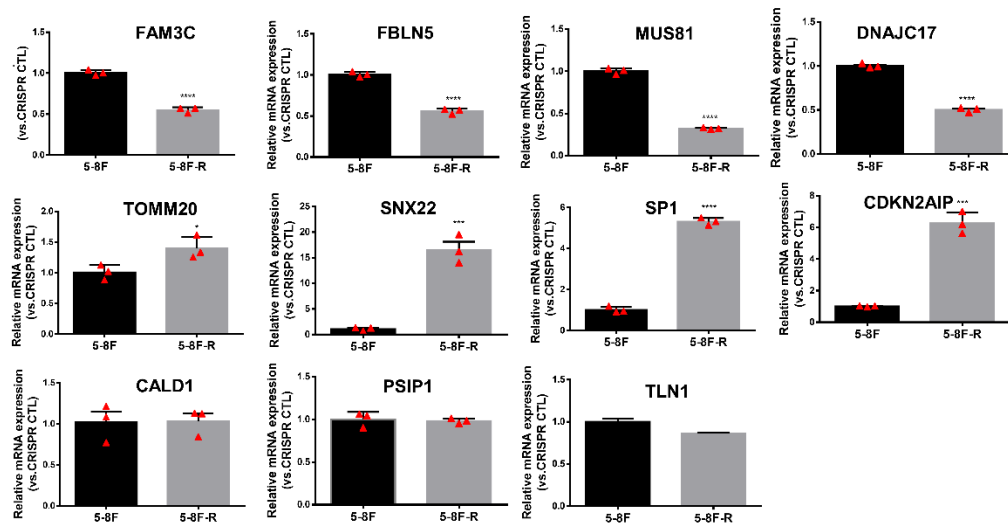

**Fig. S10** RT-qPCR was used to determine the expression levels of 11 genes in 5-8F cells and 5-8FR to confirm their radioresistant or radiosensitive status.



**Table S1. SgRNA sequences and diversity of candidate genes**

| <b>Gene symbol</b> | <b>Target Sequences(5'to3')</b> | <b>SgRNA diversity</b> |
|--------------------|---------------------------------|------------------------|
| FAM3C              | GAGGAGATGTGGCACCATTTA           | 3                      |
| FBLN5              | GCAGCAGACGTGCTACAATTT           | 5                      |
| MUS81              | CACGCGCTTCGTATTTTCAGAA          | 5                      |
| DNAJC17            | CCAGAGCAGCUGAACUCUUTT           | 5                      |
| CALD1              | GCAGCAGGCACACCAAUATT            | 5                      |
| TOMM20             | GCTGTTCAGAAGTTCTTCCTT           | 5                      |
| CDKN2AIP           | GCUCCUAAAUGCAGCUAUUTT           | 5                      |
| SP1                | CCACTCCTTCAGCCCTTATTA           | 6                      |
| SNX22              | GCUGCACAAGCGGAUCAAGAATT         | 5                      |
| PSIP1              | TTTAGGACCAAAGGATATATT           | 6                      |
| TLN1               | GCAGTGAAAGATGTAGCCAAA           | 5                      |

**Table S2. Primers of candidate genes for RT-qPCR**

| <b>Gene</b> | <b>Sequences</b>                                                                    |
|-------------|-------------------------------------------------------------------------------------|
| FBLN5       | forward: 5'-GCAGCAGACGTGCTACAATTTACAA-3'<br>reverse: 5'-CAGGGTTCTCAGCAGGACACATAC-3' |
| FAM3C       | forward: 5'-CTGCAAAGTTGGTGGTAGCTGTG-3'<br>reverse: 5'-ACGTGCAGCTGTGTCCAATG-3'       |
| MUS81       | forward: 5'-AGTGGAGCCAAGGGAAAAGA-3'<br>reverse: 5'-GGGGCACTAACGAGAGGAGA-3'          |
| DNAJC17     | forward: 5'-GAGGTTCTCAACCTGGTGCTTTC-3'<br>reverse: 5'-GGTTATCCACCAGGCCAACTTC-3'     |
| CALD1       | forward: 5'-CCGCATCAATGAATGGCTAACTAA-3'<br>reverse: 5'-GTTCCGCTTGCTGGATACGTC-3'     |
| TLN1        | forward: 5'-TGTGCCAATGGCTACCTGGA-3'<br>reverse: 5'-GAACCAGCCACACGCTTTGA-3'          |
| PSIP1       | forward: 5'-ACAGCCCTGTCCTTCAGAGAGTG-3'<br>reverse: 5'-CCTCTTCATCCTTCTTAGGCTGCTT-3'  |
| SNX22       | forward: 5'-AGTAGTAGCCCTTGCTTCCACAAC-3'<br>reverse: 5'-CCAACGCAGGCAAAGACA-3'        |
| CDKN2AIP    | forward: 5'-CGCTAGCACGGATGAAGCTG-3'<br>reverse: 5'-ATAGGTTGGAGCATCTGTCACCTTG-3'     |
| TOMM20      | forward: 5'-CCTGACCTTAAAGATGCTGAAGCTG-3'<br>reverse: 5'-ATCTGGAACACTGGTGGTGGAA-3'   |
| SP1         | forward: 5'-TCACACGTTTCGGATGAGCTACAG-3'                                             |

| reverse: 5'-ATGAAGCGCTTAGGACACTCAGG-3'         |         |
|------------------------------------------------|---------|
| Total number of library sgRNA (N)              | 123.411 |
| Number of library sgRNA with 0 read times (N0) | 293     |
| Library sgRNA coverage rate                    | 99.76%  |
| Reference                                      | >98%    |

**Table S3. Coverage statistics of library sgRNA**

Note: Library sgRNA coverage (%) =  $(N-N0) / N \times 100\%$  (N= total number of library sgRNA; N0= Number of sgRNA with 0 high-throughput sequencing read times)

**Table S4. Homogeneity analysis of library sgRNA**

|                      | SgRNA cumulative frequency | SgRNA read times | the difference multiple of sgRNA reading times |
|----------------------|----------------------------|------------------|------------------------------------------------|
| The library of virus | 0.90                       | 71               | 5.92                                           |
|                      | 0.10                       | 12               |                                                |
| Reference            |                            |                  | <15                                            |

Note: When the cumulative frequency of sgRNA is 0.10 and 0.90, the number of sgRNA reads differs by multiples. Calculation formula of cumulative frequency: The cumulative frequency of sgRNA with reading times of N = the number of all sgRNA with reading times  $\leq N$  / the total number of sgRNA in library

**Table S5. Determination of lentivirus titer**

| The sample           | V (ml)   | N        | Copy number of A gene | Copy number of B gene | C    | lentivirus titer (TU/ml) | The average of lentivirus titer (TU/ml) |
|----------------------|----------|----------|-----------------------|-----------------------|------|--------------------------|-----------------------------------------|
| The library of virus | 1.00E-03 | 4.00E+05 | 3.81E+04              | 1.01E+05              | 0.75 | 3.02E+08                 | 3.00E+08                                |
|                      | 1.00E-03 | 4.00E+05 | 3.12E+04              | 7.66E+04              | 0.81 | 3.26E+08                 |                                         |
|                      | 1.00E-03 | 4.00E+05 | 3.43E+04              | 9.70E+04              | 0.71 | 2.86E+08                 |                                         |

Note: Lentivirus titer (TU/ml) =  $N \times C / N$  (N= number of cells infected by lentivirus; C= Number of lentiviruses contained in one cell =  $2 \times$  Copy number of A gene / copy number of B gene; V= Volume of lentivirus used to infect cells (ml))

**Table S6. Library virus purity test results**

| The sample           | Test item  | test method    | Test result | unit  | reference test range |
|----------------------|------------|----------------|-------------|-------|----------------------|
| The library of virus | mycoplasma | Nest PCR       | negative    | ——    | negative             |
|                      | endotoxin  | LAL            | 5.9         | EU/ml | <50                  |
|                      | chlamydia  | Culture method | negative    | ——    | negative             |
|                      | bacteria   | Culture method | negative    | ——    | negative             |
|                      | fungi      | Culture method | negative    | ——    | negative             |

**Table S7. Key genes information in the results of high-throughput sequencing analysis**

| GeneID | Symbol   | Synonyms                                        | description                                       | chromosome | Fold Change  |
|--------|----------|-------------------------------------------------|---------------------------------------------------|------------|--------------|
| 10447  | FAM3C    | GS3786 ILEI                                     | family with sequence similarity 3 member C        | 7          | 2.173134764  |
| 10516  | FBLN5    | ADCL2 ARCL1A ARMD3 DANCE EVEC FIBL5 HNARMD UP50 | fibulin 5                                         | 14         | 2.368614842  |
| 80198  | MUS81    | SLX3                                            | MUS81 structure-specific endonuclease subunit     | 11         | 2.142258603  |
| 55192  | DNAJC17  | -                                               | DnaJ heat shock protein family (Hsp40) member C17 | 15         | 2.022497019  |
| 800    | CALD1    | CDM H-CAD HCAD L-CAD LCAD NAG22                 | caldesmon 1                                       | 7          | 1.991529948  |
| 9804   | TOMM20   | MAS20 MOM19 TOM20                               | translocase of outer mitochondrial membrane 20    | 1          | -2.44760528  |
| 55602  | CDKN2AIP | CARF                                            | CDKN2A interacting protein                        | 4          | -2.487205583 |
| 6667   | SP1      | -                                               | Sp1 transcription factor                          | 12         | -2.440589176 |
| 79856  | SNX22    | -                                               | sorting nexin 22                                  | 15         | -2.625790481 |
| 11168  | PSIP1    | DFS70 LEDGF PAIP PSIP2 p52 p75                  | PC4 and SFRS1 interacting protein 1               | 9          | -2.747363999 |
| 7094   | TLN1     | ILWEQ TLN talin-1                               | talin 1                                           | 9          | -2.77007414  |

**Table S8. Detailed information of GO analysis for the selected nine genes**

| <b>GO ID</b>              | <b>Description</b>                                                                  | <b>Associated genes</b> | <b>p-value</b> |
|---------------------------|-------------------------------------------------------------------------------------|-------------------------|----------------|
| <b>Biological process</b> |                                                                                     |                         |                |
| GO:0100057                | regulation of phenotypic switching by transcription from RNA polymerase II promoter | SP1                     | 0.000351       |
| GO:1904828                | positive regulation of hydrogen sulfide biosynthetic process                        | SP1                     | 0.000351       |
| GO:0016031                | tRNA import into mitochondrion                                                      | TOMM20                  | 0.000701       |
| GO:0070096                | mitochondrial outer membrane translocase complex assembly                           | TOMM20                  | 0.000701       |
| GO:1904826                | regulation of hydrogen sulfide biosynthetic process                                 | SP1                     | 0.000701       |
| GO:1905242                | response to 3,3',5-triiodo-L-thyronine                                              | TOMM20                  | 0.000701       |
| GO:0051176                | positive regulation of sulfur metabolic process                                     | SP1                     | 0.001052       |
| GO:0072429                | response to intra-S DNA damage checkpoint signaling                                 | MUS81                   | 0.001402       |
| GO:0000727                | double-strand break repair via break-induced replication                            | MUS81                   | 0.001752       |
| GO:0035927                | RNA import into mitochondrion                                                       | TOMM20                  | 0.001752       |
| GO:0070814                | hydrogen sulfide biosynthetic process                                               | SP1                     | 0.002103       |
| GO:0007008                | outer mitochondrial membrane organization                                           | TOMM20                  | 0.002453       |
| GO:0009403                | toxin biosynthetic process                                                          | SP1                     | 0.002453       |
| GO:1900378                | positive regulation of secondary metabolite biosynthetic process                    | SP1                     | 0.002453       |
| GO:0070813                | hydrogen sulfide metabolic process                                                  | SP1                     | 0.002803       |
| GO:0072396                | response to cell cycle checkpoint signaling                                         | MUS81                   | 0.002803       |
| GO:0072402                | response to DNA integrity checkpoint signaling                                      | MUS81                   | 0.002803       |
| GO:0072423                | response to DNA damage checkpoint signaling                                         | MUS81                   | 0.002803       |
| GO:0048251                | elastic fiber assembly                                                              | FBLN5                   | 0.004201       |
| GO:1900376                | regulation of secondary metabolite biosynthetic process                             | SP1                     | 0.004201       |
| <b>Cellular component</b> |                                                                                     |                         |                |
| GO:0071953                | elastic fiber                                                                       | FBLN5                   | 0.001317027    |
| GO:0048476                | Holliday junction resolvase complex                                                 | MUS81                   | 0.001646051    |
| GO:0001652                | granular component                                                                  | CDKN2AIP                | 0.001974983    |
| GO:0005742                | mitochondrial outer membrane translocase complex                                    | TOMM20                  | 0.003618247    |
| GO:0031089                | platelet dense granule lumen                                                        | FAM3C                   | 0.004603092    |
| GO:0098799                | outer mitochondrial membrane protein complex                                        | TOMM20                  | 0.005914921    |
| GO:0031307                | integral component of mitochondrial outer membrane                                  | TOMM20                  | 0.006570279    |
| GO:0031306                | intrinsic component of mitochondrial outer membrane                                 | TOMM20                  | 0.006897819    |
| GO:0042827                | platelet dense granule                                                              | FAM3C                   | 0.006897819    |
| GO:0044233                | Mitochondria-associated ER Membrane                                                 | TOMM20                  | 0.007552622    |
| GO:0044232                | organelle membrane contact site                                                     | TOMM20                  | 0.009841519    |
| GO:0044420                | extracellular matrix component                                                      | FBLN5                   | 0.017005762    |
| GO:0032592                | integral component of mitochondrial membrane                                        | TOMM20                  | 0.025737478    |
| GO:0098573                | intrinsic component of mitochondrial membrane                                       | TOMM20                  | 0.026059594    |
| GO:0017053                | transcriptional repressor complex                                                   | SP1                     | 0.027668804    |

|                           |                                                                                                              |                                              |             |
|---------------------------|--------------------------------------------------------------------------------------------------------------|----------------------------------------------|-------------|
| GO:0005730                | nucleolus                                                                                                    | CDKN2AIP;<br>MUS81<br>DNAJC17;<br>FBLN5;     | 0.042342651 |
| GO:0043227                | membrane-bounded organelle                                                                                   | CDKN2AIP;<br>MUS81;<br>TOMM20; SP1;<br>FAM3C | 0.046041933 |
| <b>Molecular function</b> |                                                                                                              |                                              |             |
| GO:0048257                | 3'-flap endonuclease activity                                                                                | MUS81                                        | 0.000693    |
| GO:0008022                | protein C-terminus binding                                                                                   | FBLN5; SP1                                   | 0.002023    |
| GO:0030943                | mitochondrion targeting sequence binding                                                                     | TOMM20                                       | 0.002078    |
| GO:0015450                | P-P-bond-hydrolysis-driven protein transmembrane transporter activity                                        | TOMM20                                       | 0.00277     |
| GO:0008821                | crossover junction endodeoxyribonuclease activity                                                            | MUS81                                        | 0.003116    |
| GO:0030023                | extracellular matrix constituent conferring elasticity                                                       | FBLN5                                        | 0.003116    |
| GO:0048256                | flap endonuclease activity                                                                                   | MUS81                                        | 0.003462    |
| GO:0097493                | structural molecule activity conferring elasticity                                                           | FBLN5                                        | 0.003807    |
| GO:0016889                | endodeoxyribonuclease activity, producing 3'-phosphomonoesters                                               | MUS81                                        | 0.004153    |
| GO:0071837                | HMG box domain binding                                                                                       | SP1                                          | 0.005534    |
| GO:0008320                | protein transmembrane transporter activity                                                                   | TOMM20                                       | 0.007602    |
| GO:0022884                | macromolecule transmembrane transporter activity                                                             | TOMM20                                       | 0.008635    |
| GO:0043425                | bHLH transcription factor binding                                                                            | SP1                                          | 0.009667    |
| GO:0035035                | histone acetyltransferase binding                                                                            | SP1                                          | 0.010354    |
| GO:0016894                | endonuclease activity, active with either ribo- or deoxyribonucleic acids and producing 3'-phosphomonoesters | MUS81                                        | 0.010697    |
| GO:0001103                | RNA polymerase II repressing transcription factor binding                                                    | SP1                                          | 0.012071    |
| GO:0004520                | endodeoxyribonuclease activity                                                                               | MUS81                                        | 0.014812    |
| GO:0005048                | signal sequence binding                                                                                      | TOMM20                                       | 0.016522    |
| GO:1904680                | peptide transmembrane transporter activity                                                                   | TOMM20                                       | 0.018571    |
| GO:0004536                | deoxyribonuclease activity                                                                                   | MUS81                                        | 0.020956    |

GO: Gene Ontology

**Table S9. KEGG pathway analysis of candidate genes**

| <b>Pathway ID</b> | <b>Pathway</b>                                      | <b>Gene name</b> | <b>p-value</b> |
|-------------------|-----------------------------------------------------|------------------|----------------|
| ko03440           | Homologous recombination                            | MUS81            | 0.010076       |
| ko03460           | Fanconi anemia pathway                              | MUS81            | 0.013112       |
| ko04137           | Mitophagy - animal                                  | SP1              | 0.017076       |
| ko04927           | Cortisol synthesis and secretion                    | SP1              | 0.017774       |
| ko04350           | TGF-beta signaling pathway                          | SP1              | 0.021496       |
| ko05231           | Choline metabolism in cancer                        | SP1              | 0.025442       |
| ko01522           | Endocrine resistance                                | SP1              | 0.027065       |
| ko04928           | Parathyroid hormone synthesis, secretion and action | SP1              | 0.027297       |
| ko05224           | Breast cancer                                       | SP1              | 0.037695       |
| ko04934           | Cushing syndrome                                    | SP1              | 0.039308       |
| ko04915           | Estrogen signaling pathway                          | SP1              | 0.039768       |
| ko05202           | Transcriptional misregulation in cancers            | SP1              | 0.045285       |

KEGG: Kyoto Encyclopedia of Genes and Genomes
